# Supplementary material
Source: MDPI journal article supplement (https://www.mdpi.com/2073-4395/12/9/2007)
Supplement: s1 [file s1]

**Fig. S1.** HPLC-DAD profile, visualized at 280nm, of the olive leaves extracts (OLEs) object of this study during the first observation period (January-February). Numbers refer to Table S1 and text. B = ‘Biancolilla’; NE = ‘Nocellara Etnea’; NM = ‘Nocellara Messinese’; NS = ‘Nocellara Siracusana’; Z = ‘Zaituna’. See text for further details.

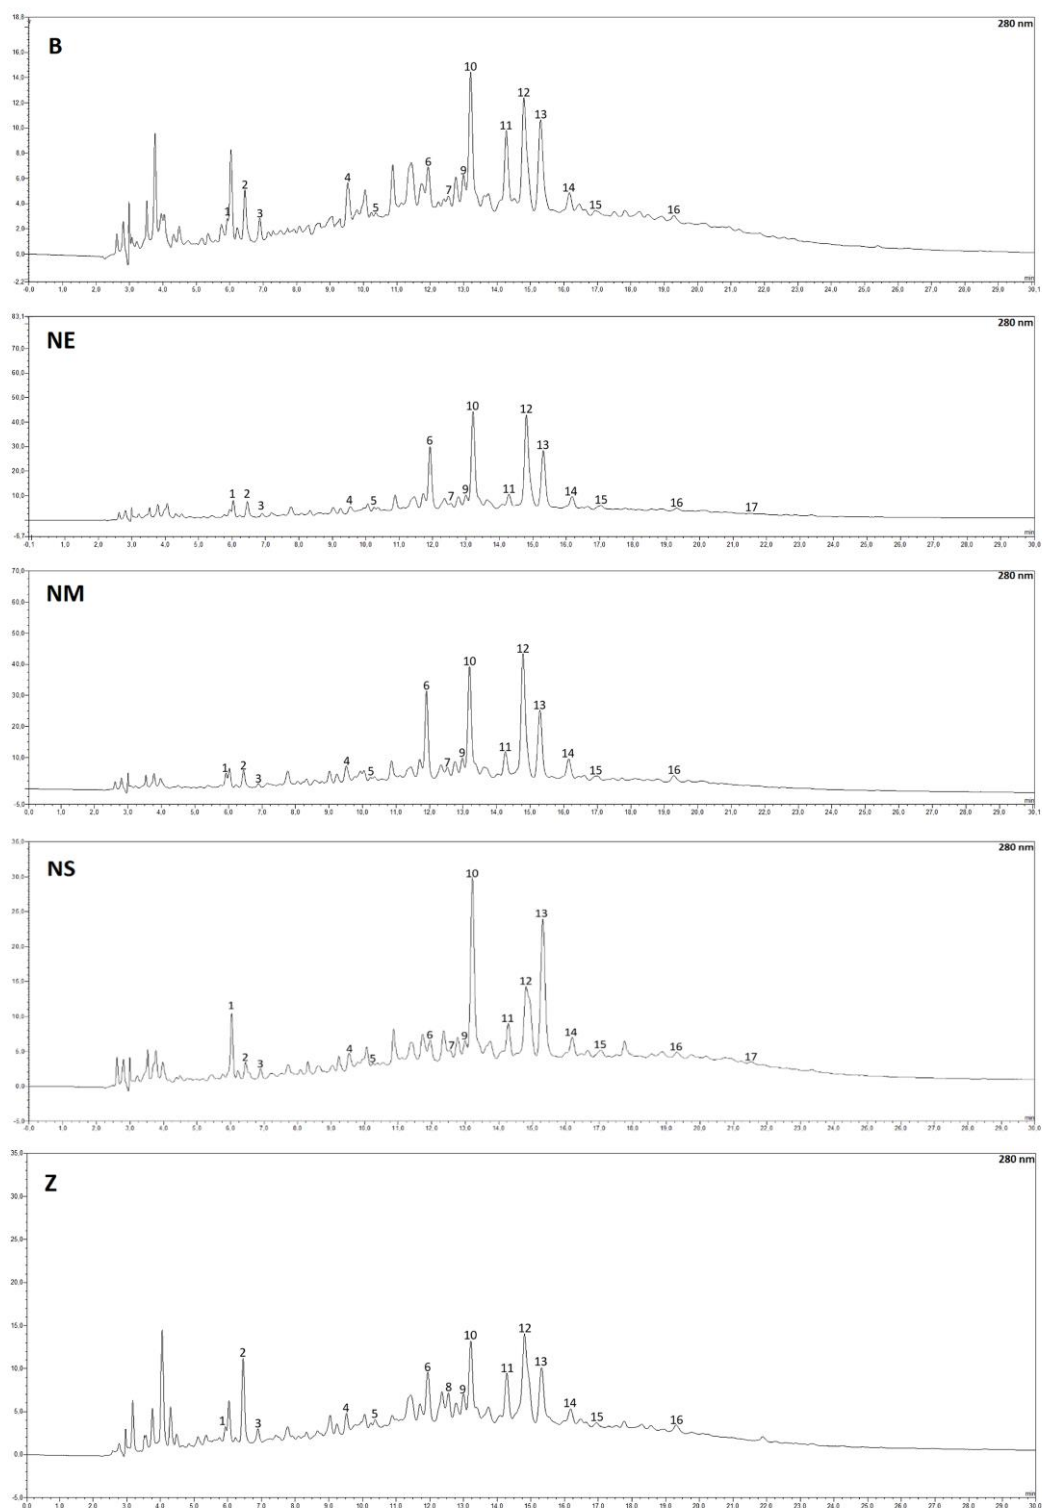

**Table S1**

Phenols identified in OLEs from five Sicilian cultivars object of this study using HPLC/DAD and HPLC/ESI-MS. See Figure S1 for numbering and text for details.

| peak | compound                                        | Rt <sup>a</sup> | λmax <sup>b</sup> | m/z exp <sup>c</sup> | subclass             |
|------|-------------------------------------------------|-----------------|-------------------|----------------------|----------------------|
| 1    | hydroxytyrosol glucoside                        | 5.93            | 280.1             | 315                  | simple phenol        |
| 2    | hydroxytyrosol <sup>d</sup>                     | 6.46            | 280.5             | 153                  | simple phenol        |
| 3    | dihydroxyphenylacetic acid (DOPAC) <sup>d</sup> | 6.92            | 280.6             | 167                  | simple phenol        |
| 4    | chlorogenic acid <sup>d</sup>                   | 9.53            | 325, 295sh        | 353, 191             | hydroxycinnamic acid |
| 5    | caffeic acid <sup>d</sup>                       | 10.36           | 323, 290sh        | 179                  | hydroxycinnamic acid |
| 6    | verbascoside <sup>d</sup>                       | 11.95           | 329,290sh         | 623,461              | hydroxycinnamic acid |
| 7    | p-coumaric acid                                 | 12.54           | 309.5             | 163                  | hydroxycinnamic acid |
| 8    | ferulic acid <sup>d</sup>                       | 12.78           | 322, 290sh        | 193                  | hydroxycinnamic acid |
| 9    | rutin <sup>d</sup>                              | 13.09           | 354, 255          | 609, 463             | flavonoid            |
| 10   | luteolin 7- <i>O</i> -glucoside <sup>d</sup>    | 13.23           | 349.7, 264.3, 254 | 447, 285             | flavonoid            |
| 11   | apigenin hexoside                               | 14.28           | 335, 266.3        | 431                  | flavonoid            |
| 12   | oleuropein <sup>d</sup>                         | 14.82           | 280.6, 240.5      | 539, 377, 307        | secoiridoid          |
| 13   | apigenin 7- <i>O</i> -glucoside <sup>d</sup>    | 15.30           | 337, 266          | 431, 269             | flavonoid            |
| 14   | ligstroside <sup>d</sup>                        | 16.18           | 276, 244          | 523, 361             | secoiridoid          |
| 15   | oleuropein aglicone                             | 16.95           | 280, 241          | 377                  | secoiridoid          |
| 16   | luteolin <sup>d</sup>                           | 19.27           | 349, 265, 253     | 285                  | flavonoid            |
| 17   | apigenin                                        | 21.48           | 366, 267          | 269                  | flavonoid            |

<sup>a</sup> retention time, in minutes, as mean of 5 (cultivars) x 4 (observation periods) x 3 (replicates) = 60 chromatographic analyses

<sup>b</sup> absorption maxima expressed in nm, from HPLC.

<sup>c</sup> detected pseudomolecular ion mass [M-H]<sup>-</sup> and main fragments

<sup>d</sup> identification confirmed with the use of the corresponding commercial standard; see experimental for details
